# Supplementary figures and images for: Changes in the fecal microbiota in dogs with acute hemorrhagic diarrhea during an outbreak in Norway
Source: PubMed Central journal article supplement — J Vet Intern Med. 2021 Jul 21;35(5):2177–86. doi: 10.1111/jvim.16201 (PMC8478063; doi:10.1111/jvim.16201), 2021-07-21

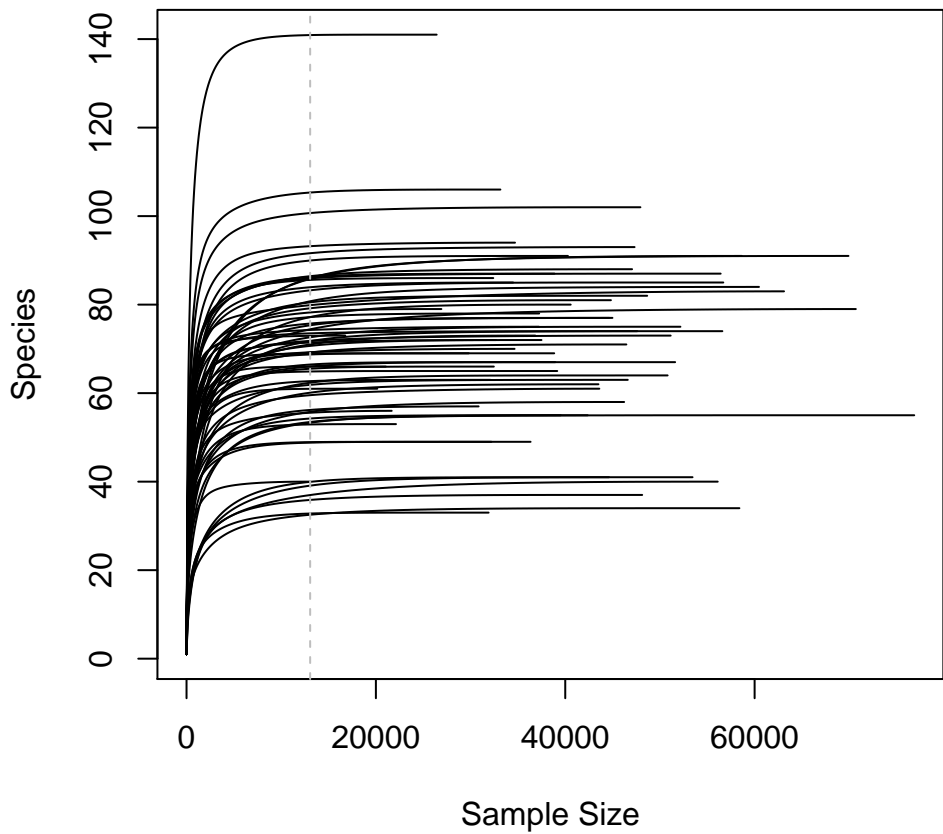

Supplement: JVIM-35-2177-s001.pdf [file JVIM-35-2177-s001.pdf]

**A**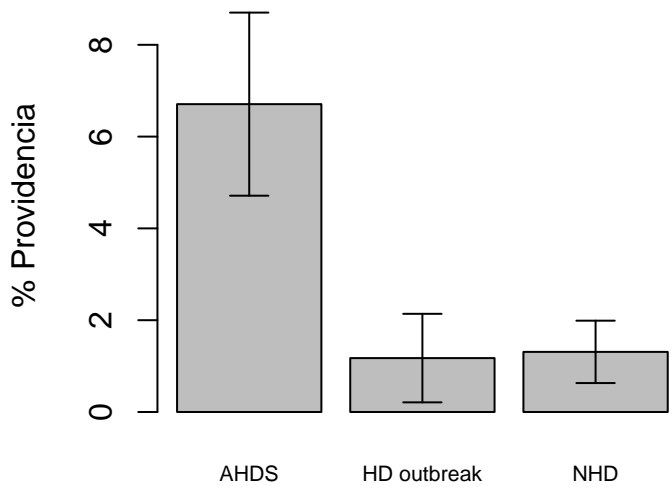**B**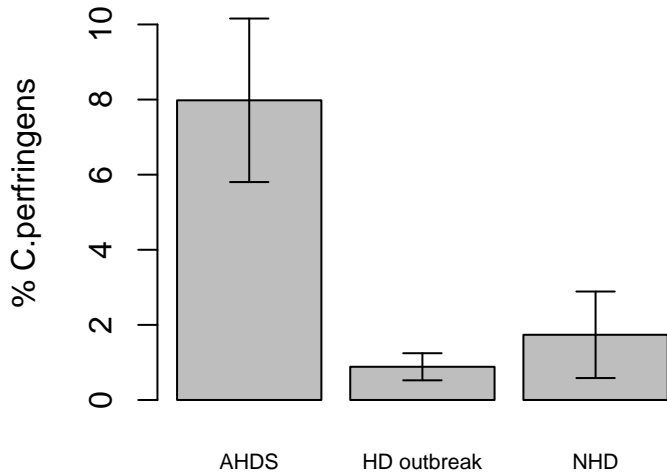

Supplement: JVIM-35-2177-s002.pdf [file JVIM-35-2177-s002.pdf]

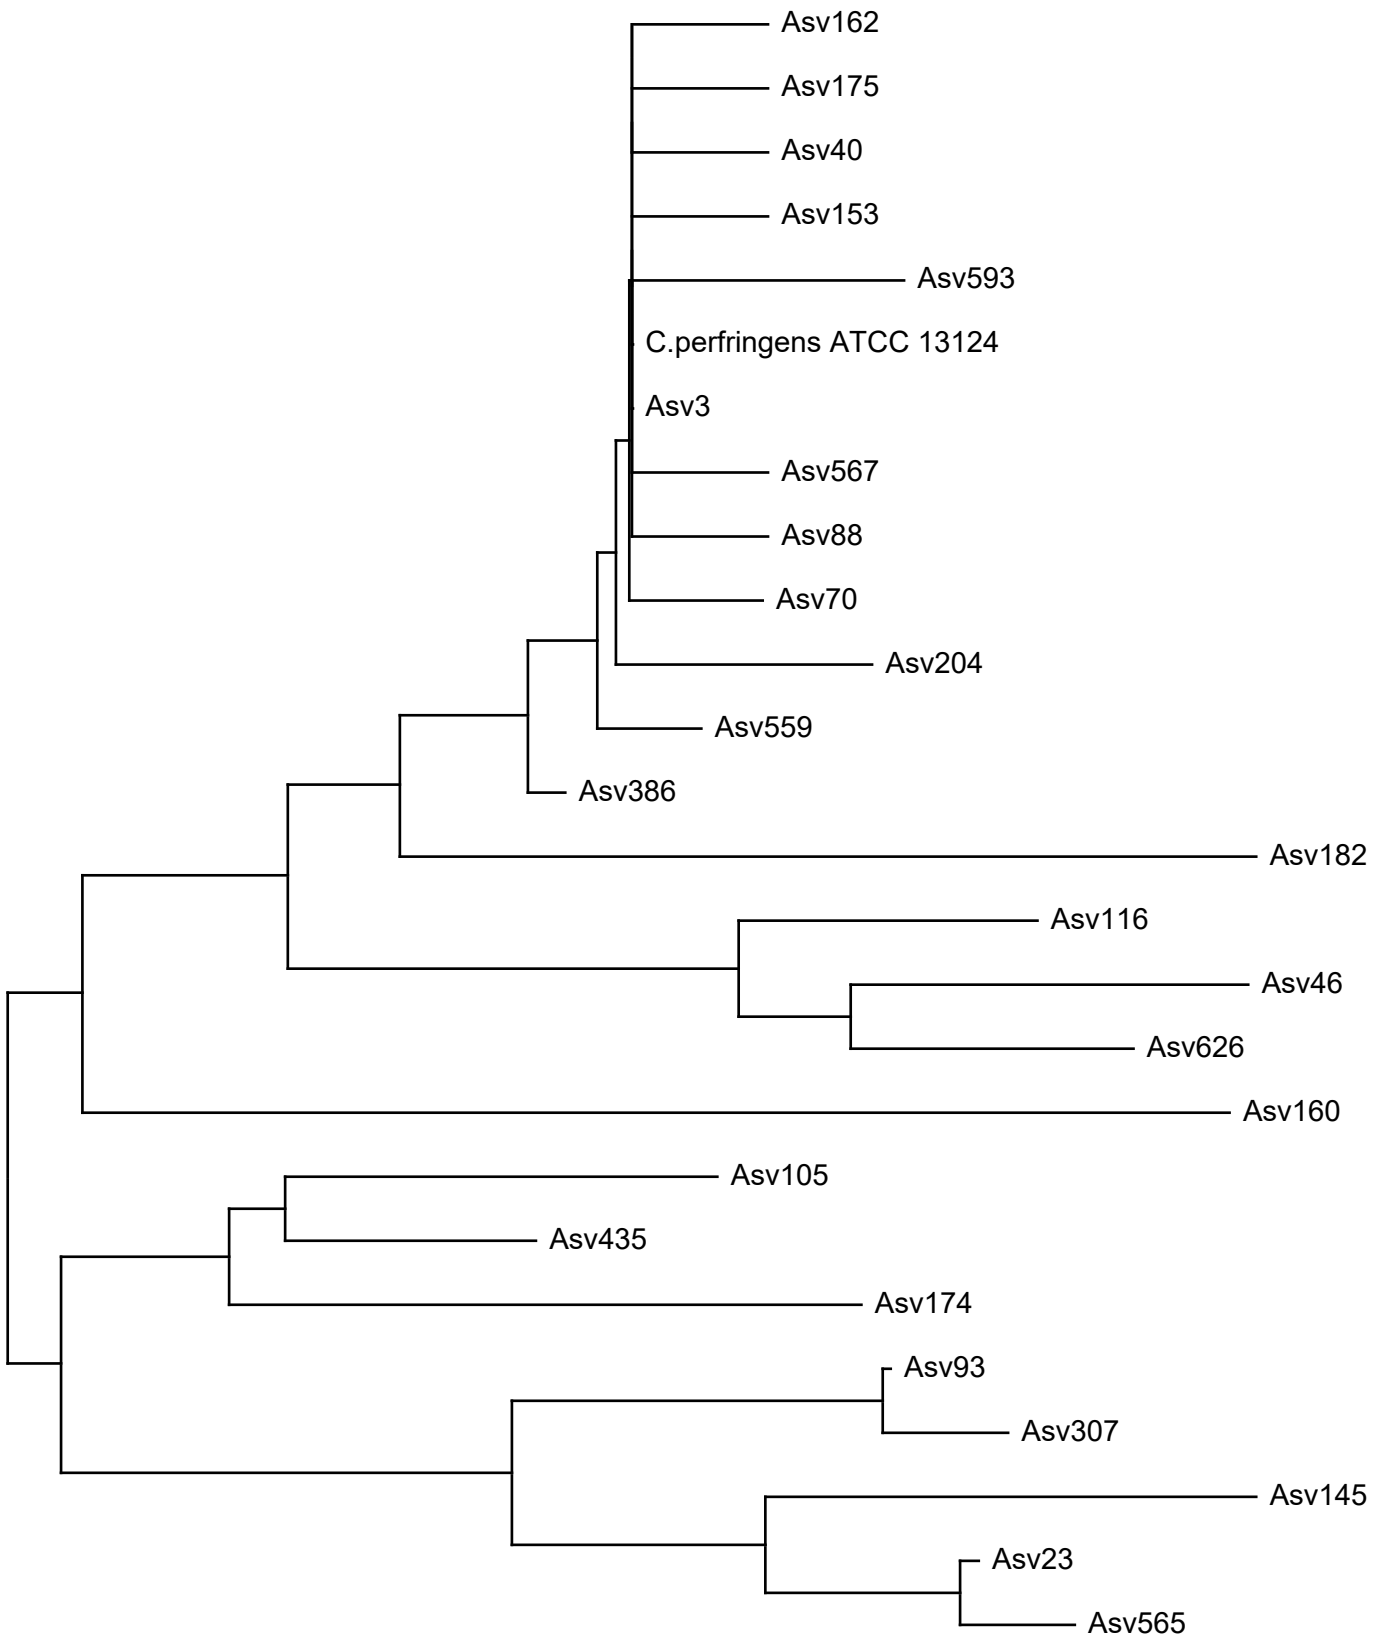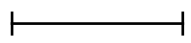

0,0050

Supplement: JVIM-35-2177-s004.pdf [file JVIM-35-2177-s004.pdf]

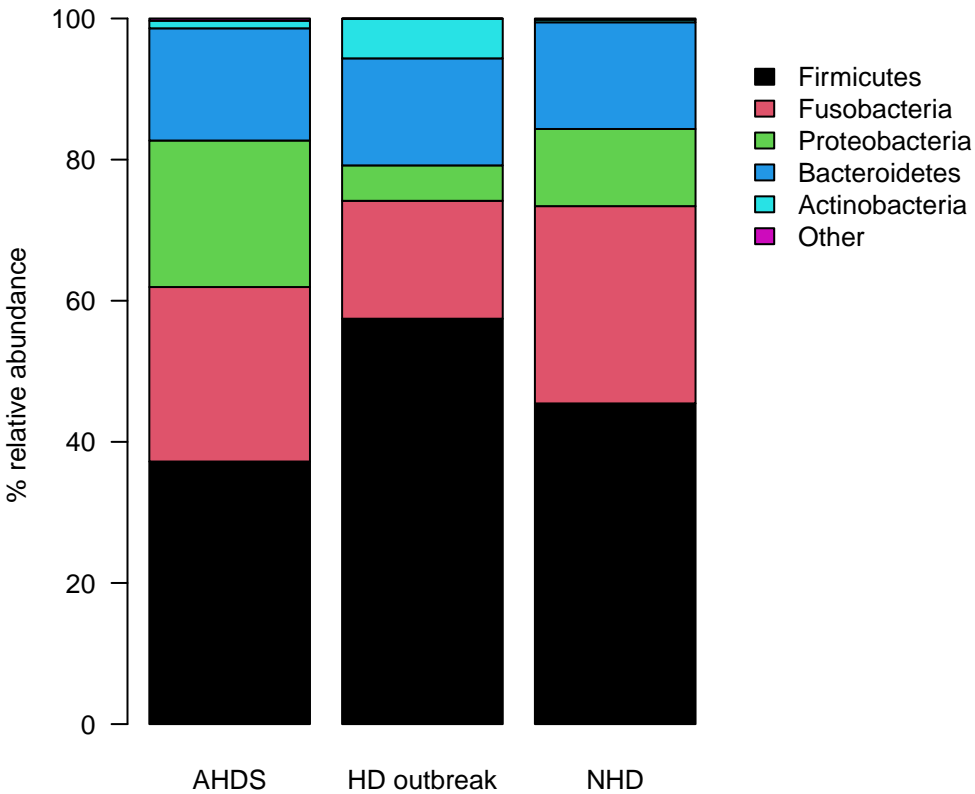

Supplement: JVIM-35-2177-s005.pdf [file JVIM-35-2177-s005.pdf]

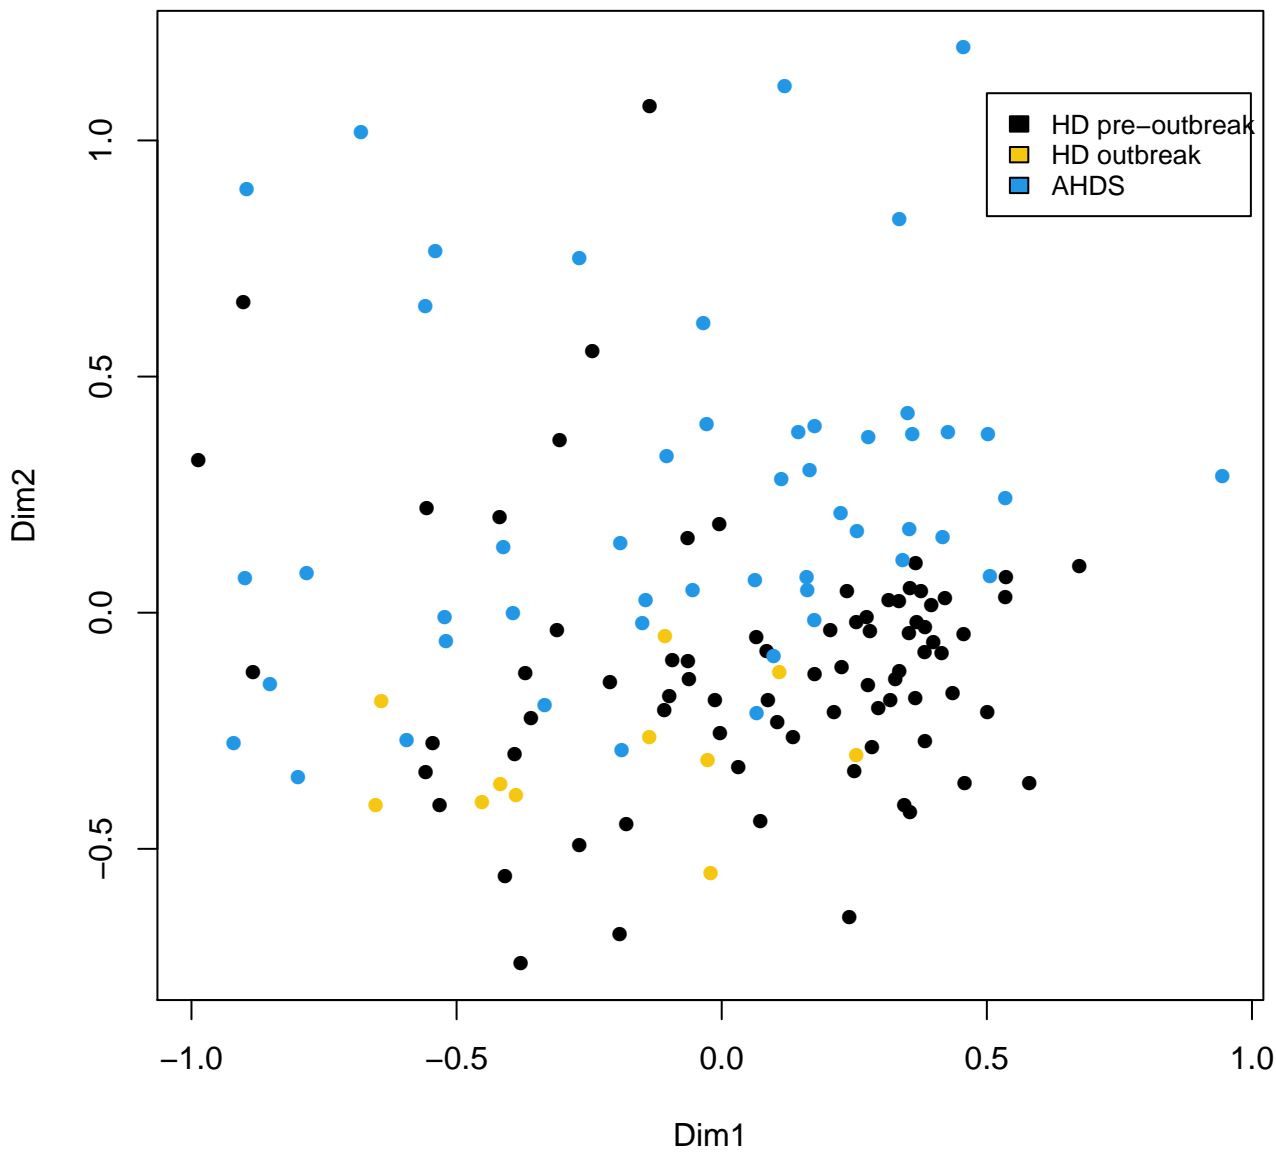

Supplement: JVIM-35-2177-s006.pdf [file JVIM-35-2177-s006.pdf]
